# From Bench to Bedside and Back Again

## *A Personal Journey with Dexmedetomidine*

Mervyn Maze, M.B., Ch.B.

Dexmedetomidine Diminishes Halothane Anesthetic Requirements in Rats Through a Postsynaptic Alpha 2 Adrenergic Receptor. By Segal IS, Vickery RG, Walton JK, Doze VA, and Maze M. *ANESTHESIOLOGY* 1988; 125:590–4. Abstract reprinted with permission.

**Abstract:** The effect of 4(5)-[1-(2,3-dimethylphenyl)ethyl]imidazole (medetomidine), the  $\alpha_2$  adrenergic agonist, on anesthetic requirements was investigated in rats anesthetized with halothane. Halothane MAC was determined before and after either dexmedetomidine (D-enantiomer) or levomedetomidine (L-enantiomer) 10, 30, and 100  $\mu\text{g}/\text{kg}$ , or vehicle intraperitoneally. There was a dose-dependent increase in MAC with the D-, but not the L-, stereoisomer. At the highest dose of dexmedetomidine (100  $\mu\text{g}/\text{kg}$ ), halothane could be discontinued for up to 30 min with no response to tail clamping. To determine whether  $\alpha_2$  adrenoreceptors mediated this effect of dexmedetomidine on MAC, cohorts of rats were pretreated with idazoxan, 10 mg/kg intraperitoneally, a highly selective  $\alpha_2$  antagonist. This completely prevented the reduction of MAC caused by dexmedetomidine. To determine whether the reduction of MAC caused by dexmedetomidine was mediated in part through either opiate or adenosine receptors, groups of rats were pretreated with either naltrexone, 5 mg/kg

intraperitoneally, an opiate antagonist, or 8-phenyltheophylline, 2.5 mg/kg intraperitoneally, an  $A_1$  adenosine antagonist. These two pretreatments did not alter the reduction of MAC by dexmedetomidine. To determine whether postsynaptic mechanisms mediate the anesthetic effect of dexmedetomidine, rats were depleted of central catecholamine stores with either *n*-(2-chloroethyl)-*n*-ethyl-2-bromobenzylamine or reserpine and  $\alpha$ -methyl-para-tyrosine, and MAC was determined before and after each dose of dexmedetomidine. While the catecholamine-depleted rats had a lower basal MAC than the vehicle controls, there was still a profound reduction in halothane MAC after administration of dexmedetomidine. The reduction of MAC by dexmedetomidine was blocked with idazoxan in the catecholamine-depleted rats. These data indicate that the reduction of MAC caused by dexmedetomidine is mediated through  $\alpha_2$  adrenoreceptors with no apparent involvement of either opiate or  $A_1$  adenosine receptors. Data from catecholamine-depleted rats suggest that the mediating mechanism must involve site(s) other than or in addition to the presynaptic  $\alpha_2$  adrenergic receptors on noradrenergic neurons. The authors conclude that central postsynaptic  $\alpha_2$  adrenergic receptors mediate a significant part of the reduction of anesthetic requirements caused by dexmedetomidine.

IT is with equal measures of pride, humility, and trepidation that I agreed to revisit what is now referred to as a classic paper.<sup>1</sup> In 1985, I was seeking a way to distinguish my academic career for an upcoming date with the tenure process at Stanford University, Stanford, California. I secured a sabbatical in the Department of Physiology and Pharmacology at the Karolinska Institutet (Stockholm, Sweden) in 1986 to learn the then-novel microdialysis technique for monitoring *in vivo* neurotransmission in discrete loci within the brain. Together with interventions that acutely changed noradrenergic neurotransmission, I would then be in a position to directly test the hypothesis that central noradrenergic

Submitted for publication May 23, 2016. Accepted for publication June 3, 2016. From the Department of Anesthesia and Perioperative Care, University of California, San Francisco, San Francisco, California.

Copyright © 2016, the American Society of Anesthesiologists, Inc. Wolters Kluwer Health, Inc. All Rights Reserved. *Anesthesiology* 2016; 125:590–4

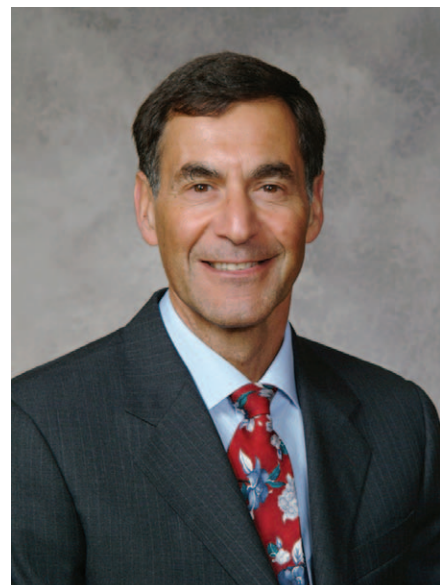

neurotransmission regulated anesthetic depth. On my return from sabbatical while visiting a postoperative patient in one of the prefabricated satellite buildings at the preearthquake Palo Alto Veterans Administration Medical Center, Palo Alto, California, I had a chance encounter with a Stanford-trained psychiatrist, John Csernansky, M.D. (Chair, Department of Psychiatry and Behavioral Sciences, Northwestern University, Chicago, Illinois). Dr. Csernansky told me about a recent visitor from Turku, Finland, who was a research pharmacologist from Farnos Group Ltd., Turku, Finland, Risto Lammintausta, M.D., Ph.D. (currently CEO, Forendo Pharma, Turku, Finland). Dr. Lammintausta had synthesized medetomidine, a very potent  $\alpha_2$  adrenergic agonist that had become an attractive candidate with which to test the above-mentioned hypothesis, as we had just completed a series of experiments with another of that drug class, azepexole, demonstrating its impressive MAC-reducing properties.<sup>2</sup> I secured a sample of medetomidine (the racemic mixture of D and L stereoisomers) from Dr. Lammintausta and started a series of experiments with Ross G. Vickery, Ph.D. (Department of Clinical Pharmacology and Experimental Medicine, Theravance, Inc., South San Francisco, California), then a newly minted B.S. graduate from Stanford, who went on to study the postreceptor ion channel signaling in G protein-coupled receptors. We undertook a comparable preclinical study to the one with azepexole and found that the first medetomidine-exposed subject remained unarousable to painful stimuli even after the volatile anesthetic had been reduced to "0" for greater than 1 hour! Because animals that were entirely depleted of norepinephrine (*i.e.*, zero noradrenergic neurotransmission) are not anesthetized,<sup>3</sup> there had to be another mechanism to explain the MAC-eliminating observation with medetomidine. To rule out an off-target effect, we administered a selective  $\alpha_2$  antagonist, yohimbine. In a Eureka moment, the previously unarousable dog immediately awoke, leaving a relieved Ross to cope with a now-frisky animal!

We reasoned that the anesthetic-inducing effect of medetomidine was an  $\alpha_2$  response but did not think that it was exclusively due to a presynaptic decrease in noradrenergic neurotransmission. At that juncture, Ira S. Segal, M.D. (Consultant Anesthesiologist, Southdale Anesthesiologists LLC, South Edina, Minnesota), then a recently trained anesthesiologist, approached me to study the mechanism of anesthetic action, and I told him about the recent observation. We decided to change the experimental species from dogs to rats because the slew of experiments needed to resolve the looming questions was going to bankrupt my laboratory unless we used less expensive reagents. Using what was considered state-of-the-art technology (that now seems quite primitive), we ruled out the presynaptic receptors that left open the possibility that medetomidine produced anesthesia through a direct action on postsynaptic receptors.<sup>1</sup> As Farnos had since resolved the racemic mixture into the L and D isomers of medetomidine, we were also able to identify that

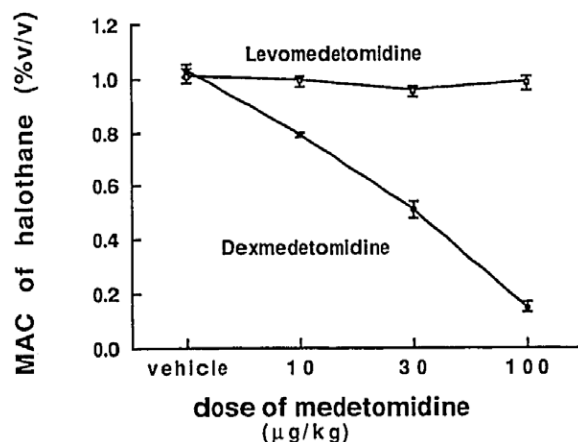

**Fig. 1.** Effect of stereoisomers of the  $\alpha_2$  adrenergic agonist, medetomidine, on halothane minimum alveolar anesthetic concentration (MAC) in rats. The MAC for halothane was determined in rats before and after either the D- (dexmedetomidine; closed circle) or the L-(levomedetomidine; open square) stereoisomer, 10, 30, and 100  $\mu\text{g/kg}$  intraperitoneally. At each dose, 10 rats were tested. Reprinted with permission from Segal IS, Vickery RG, Walton JK, Doze VA, Maze M: Dexmedetomidine diminishes halothane anesthetic requirements in rats through a postsynaptic alpha 2 adrenergic receptor. *ANESTHESIOLOGY* 1988; 69:818–23. Note: This figure appeared as figure 3 in the original article, and the figure legend has been edited.

the action was stereospecific with only the D isomer exerting hypnotic-anesthetic action (fig. 1). Collectively, these observations formed the basis for a use patent of dexmedetomidine that Mika Scheinin, M.D., Ph.D. (Professor, Department of Clinical Pharmacology, University of Turku, Turku, Finland) and I filed jointly (CA 1338556 C<sup>4</sup>); the patent was reassigned to Farnos for the princely sum of \$250,000 that Stanford was gracious enough to return to my laboratory.

With that largesse, we were able to pursue studies, including with Brian K. Kobilka, M.D. (Professor, Department of Molecular and Cellular Physiology, Stanford University; 2012 Nobel Laureate in Chemistry) and Lee E. Limbird, Ph.D. (Professor of Biochemistry, Fisk University, Nashville, Tennessee; Editor, *Goodman and Gilman's Manual of Pharmacology and Therapeutics*), to define the site, structure, and signal transduction mechanisms for dexmedetomidine's hypnotic-anesthetic action.<sup>5–9</sup> Armed with this knowledge, Kobilka, Michael Levitt, Ph.D. (Professor of Structural Biology, Stanford University; 2013 Nobel Laureate in Chemistry), and I briefly entertained the idea of a Stanford start-up company that would use structural biology and high-throughput screening to synthesize and screen the next generation of highly selective  $\alpha_2$  adrenergic agonists; however, no venture capitalist wanted to risk their money on a trio of ne'er-do-wells!

We entered into a stage of clinical investigation in which we collaborated with the group at University of California, Los Angeles, Los Angeles, California, who had pursued the perioperative use of clonidine, another  $\alpha_2$  adrenergic agonist<sup>10</sup>; our University of California, Los Angeles collaborators included

the gifted pharmacologist, Byron Bloor, Ph.D., who was tragically killed in a boating accident soon after completing a seminal series of volunteer studies.<sup>11,12</sup> By then we were pursuing a route-to-market authorization that required key pharmacokinetic and pharmacodynamic studies, ably supervised by Steven Shafer, M.D. (Professor of Anesthesiology, Perioperative and Pain Medicine, Stanford University), a Palo Alto Veterans Administration Medical Center collaborator.<sup>13,14</sup> Par for the course in that era of volunteer investigation, we recruited residents from our training program in whom we were unable to identify a dexmedetomidine electroencephalogram profile because it so closely resembled their baseline—a state of exhaustion from sleep deprivation! The similarity between dexmedetomidine sedation and natural sleep was subsequently established by two graduate students at Imperial College London, London, United Kingdom: Laura Nelson Carney, Ph.D. (currently Mentor, Center for Entrepreneurship, The Chinese University of Hong Kong, Shatin, Hong Kong), in rats,<sup>15</sup> and Robert Sanders, M.B.B.S., Ph.D. (currently Assistant Professor, Department of Anesthesiology, University of Wisconsin, Madison, Wisconsin), in humans.<sup>16</sup> One of the recruited volunteers had an 11.5-s period of sinus arrest with no cerebral blood flow but was able to recall the frenetic conversation that I had with the research nurse about administering glycopyrrolate through the pulmonary artery catheter. Again, this vagomimetic feature would teach us plenty about dexmedetomidine (vide infra) and left some wondering whether one could complete anesthesia training at Stanford without cerebral blood flow; the volunteer did and is now an associate professor at a prestigious institution.

Finally, we were ready for a phase 3 pivotal trial; however, there was no consensus regarding which of the pleiotropic properties of dexmedetomidine should be the basis for the clinical label. Enter Romeo Bachand, M.D., Ph.D. (Chief Scientific Officer, Kenna Technologies, Inc., West Chester, Pennsylvania), then a consultant for Abbott Laboratories (Lake Bluff, Illinois), who led approximately 1,000 patient trials within the space of 12 weeks that established the efficacy and safety of dexmedetomidine as a sedative for no more than 24 h during mechanical ventilation in mostly cardiac surgical patients. While the Food and Drug Administration rapidly approved the New Drug Application for Precedex (Hospira, USA), the European Medicines Agency requested further comparative outcome studies with the other commonly used sedatives, propofol, and midazolam, which resulted in a decade-long delay to market authorization of Dexdor (trade name for dexmedetomidine in Europe).

Since the introduction of dexmedetomidine into clinical practice in 1999, there have been more than 600 published clinical trials culminating with the recent demonstration of the efficacy of dexmedetomidine in agitated, delirious patients.<sup>17</sup> The interest in the use of dexmedetomidine for extremely ill patients in the intensive care unit (ICU) may have had its genesis from a series of studies arising from an extremely fruitful collaboration with the outstanding biophysicist, Nicholas Franks, Ph.D. (Professor of Biophysics

and Anaesthetics, Imperial College London), who has devoted his entire academic life to understanding the molecular foundation for anesthetic action. These and subsequent studies provide the scientific underpinnings for the similarity that had been noted earlier between natural sleep and dexmedetomidine-induced sedation<sup>15,18</sup>; with this foundation, clinical studies were launched to exploit the restorative properties of a pharmacologically-induced natural sleep.

Pratik Pandharipande, M.D. (Professor of Anesthesiology and Surgery, Vanderbilt University, Nashville, Tennessee), and E. Wesley Ely, M.D. (Professor of Medicine, Vanderbilt University, Nashville, Tennessee), were seeking an intervention to decrease the delirium in ICU patients, which resulted in substantial morbidity and mortality, as well as incremental costs associated with prolonged stays in the ICU. In the first of many such studies, they demonstrated an increase in coma- and delirium-free days with dexmedetomidine-based sedation when compared to lorazepam, which at that time was the most frequently used ICU sedative.<sup>19</sup> In an *a priori*-designed analysis, Pandharipande *et al.*<sup>20</sup> showed that all-cause mortality could be improved with dexmedetomidine in a septic subset of patients from the Maximizing Efficacy of Targeted Sedation and Reducing Neurologic Dysfunction Study (MENDS); this finding is now being investigated in the National Institutes of Health-supported MENDS II trial comparing sedation with dexmedetomidine to that provided by propofol in septic patients.<sup>21</sup> Recent trials continue to further explore how to harness dexmedetomidine's benefits for a wider range of patients in the critical care environment.<sup>17,22</sup>

The foundation for dexmedetomidine's effect on survival may have had its basis in the earlier observation of its vagomimetic properties because perioperative vagal activation is a key homeostatic process to resolve inflammation<sup>23</sup>; this inflammation-resolving property is beneficial in preclinical models of brain<sup>24</sup> and kidney<sup>25</sup> injury. Dexmedetomidine's benefit in models of brain injury inspired Robert Sanders to explore, and subsequently demonstrate, its role in improving anesthetic-induced developmental neurotoxicity.<sup>26</sup> A basic science consortium under the auspices of SmartTots is now optimizing the utility of dexmedetomidine in preclinical models for subsequent clinical trials as an adjuvant to enhance the safety of pediatric anesthetic regimens.

My experience in investigating dexmedetomidine has enriched my academic career, from the many eminent collaborators with whom I now have enduring friendships, to the 74 publications and countless speaking opportunities that these collaborative studies engendered. Early on, however, it did not seem such a good idea! My manuscript productivity was thwarted by delays to file patents leaving Stanford to ask for evidence why I should become a tenured professor! Investigating dexmedetomidine was my first endeavor in drug discovery and development, and having been bitten by that alluring bug, it has proven not to be my last with current efforts to derive clinical benefit from xenon, as well as strategies to combat postoperative cognitive decline.<sup>27,28</sup>

Reduced to its foundations, our clinical specialty is applied pharmacology, and I await many more pharmacology-based discoveries from the realms of its practitioners.

## Research Support

Dr. Maze is supported by the Department of Anesthesia and Perioperative Care, University of California, San Francisco, and by grant No. R01 GM104194 from the National Institutes of Health (Bethesda, Maryland).

## Correspondence

Address correspondence to Dr. Maze: Department of Anesthesia and Perioperative Care, University of California, San Francisco, 1001 Potrero Avenue, Box 1363, San Francisco, California 94143. [mervyn.maze@ucsf.edu](mailto:mervyn.maze@ucsf.edu). Information on purchasing reprints may be found at [www.anesthesiology.org](http://www.anesthesiology.org) or on the masthead page at the beginning of this issue. ANESTHESIOLOGY's articles are made freely accessible to all readers, for personal use only, 6 months from the cover date of the issue.

## References

- Segal IS, Vickery RG, Walton JK, Doze VA, Maze M: Dexmedetomidine diminishes halothane anesthetic requirements in rats through a postsynaptic alpha 2 adrenergic receptor. ANESTHESIOLOGY 1988; 69:818–23
- Maze M, Vickery RG, Merlone SC, Gaba DM: Anesthetic and hemodynamic effects of the alpha 2-adrenergic agonist, azepexole, in isoflurane-anesthetized dogs. ANESTHESIOLOGY 1988; 68:689–94
- Miller RD, Way WL, Eger EI II: The effects of alpha-methyl-dopa, reserpine, guanethidine, and iproniazid on minimum alveolar anesthetic requirement (MAC). ANESTHESIOLOGY 1968; 29:1153–8
- CA 1338556 C: "4-Substituted Imidazole Derivatives Useful in Perioperative Care." Grant filed February 28, 1989; published August 27, 1996. Available at: <http://google.com/patents/CA1338556C?cl=zh-CN>. Accessed May 2, 2016
- Correa-Sales C, Rabin BC, Maze M: A hypnotic response to dexmedetomidine, an alpha 2 agonist, is mediated in the locus coeruleus in rats. ANESTHESIOLOGY 1992; 76:948–52
- Correa-Sales C, Nacif-Coelho C, Reid K, Maze M: Inhibition of adenylate cyclase in the locus coeruleus mediates the hypnotic response to an alpha 2 agonist in the rat. J Pharmacol Exp Ther 1992; 263:1046–9
- Correa-Sales C, Reid K, Maze M: Pertussis toxin-mediated ribosylation of G proteins blocks the hypnotic response to an alpha 2-agonist in the locus coeruleus of the rat. Pharmacol Biochem Behav 1992; 43:723–7
- Mizobe T, Maze M, Lam V, Suryanarayana S, Kobilka BK: Arrangement of transmembrane domains in adrenergic receptors. Similarity to bacteriorhodopsin. J Biol Chem 1996; 271:2387–9
- Lakhlani PP, MacMillan LB, Guo TZ, McCool BA, Lovinger DM, Maze M, Limbird LE: Substitution of a mutant alpha2a-adrenergic receptor *via* "hit and run" gene targeting reveals the role of this subtype in sedative, analgesic, and anesthetic-sparing responses *in vivo*. Proc Natl Acad Sci USA 1997; 94:9950–5
- Flacke JW, Bloor BC, Flacke WE, Wong D, Dazza S, Stead SW, Laks H: Reduced narcotic requirement by clonidine with improved hemodynamic and adrenergic stability in patients undergoing coronary bypass surgery. ANESTHESIOLOGY 1987; 67:11–9
- Belleville JP, Ward DS, Bloor BC, Maze M: Effects of intravenous dexmedetomidine in humans. I. Sedation, ventilation, and metabolic rate. ANESTHESIOLOGY 1992; 77:1125–33
- Bloor BC, Ward DS, Belleville JP, Maze M: Effects of intravenous dexmedetomidine in humans. II. Hemodynamic changes. ANESTHESIOLOGY 1992; 77:1134–42
- Dyck JB, Maze M, Haack C, Azarnoff DL, Vuorilehto L, Shafer SL: Computer-controlled infusion of intravenous dexmedetomidine hydrochloride in adult human volunteers. ANESTHESIOLOGY 1993; 78:821–8
- Dyck JB, Maze M, Haack C, Vuorilehto L, Shafer SL: The pharmacokinetics and hemodynamic effects of intravenous and intramuscular dexmedetomidine hydrochloride in adult human volunteers. ANESTHESIOLOGY 1993; 78:813–20
- Nelson LE, Lu J, Guo T, Saper CB, Franks NP, Maze M: The alpha2-adrenoceptor agonist dexmedetomidine converges on an endogenous sleep-promoting pathway to exert its sedative effects. ANESTHESIOLOGY 2003; 98:428–36
- Sanders RD, Maze M: Contribution of sedative-hypnotic agents to delirium *via* modulation of the sleep pathway. Can J Anaesth 2011; 58:149–56
- Reade MC, Eastwood GM, Bellomo R, Bailey M, Bersten A, Cheung B, Davies A, Delaney A, Ghosh A, van Haren F, Harley N, Knight D, McGuiness S, Mulder J, O'Donoghue S, Simpson N, Young P; DaLIA Investigators; Australian and New Zealand Intensive Care Society Clinical Trials Group: Effect of dexmedetomidine added to standard care on ventilator-free time in patients with agitated delirium: A randomized clinical trial. JAMA 2016; 315:1460–8
- Zhang Z, Ferretti V, Guntan İ, Moro A, Steinberg EA, Ye Z, Zecharia AY, Yu X, Vyssotski AL, Brickley SG, Yustos R, Pillidge ZE, Harding EC, Wisden W, Franks NP: Neuronal ensembles sufficient for recovery sleep and the sedative actions of  $\alpha 2$  adrenergic agonists. Nat Neurosci 2015; 18:553–61
- Pandharipande PP, Pun BT, Herr DL, Maze M, Girard TD, Miller RR, Shintani AK, Thompson JL, Jackson JC, Deppen SA, Stiles RA, Dittus RS, Bernard GR, Ely EW: Effect of sedation with dexmedetomidine *vs* lorazepam on acute brain dysfunction in mechanically ventilated patients: The MENDS randomized controlled trial. JAMA 2007; 298:2644–53
- Pandharipande PP, Sanders RD, Girard TD, McGrane S, Thompson JL, Shintani AK, Herr DL, Maze M, Ely EW; MENDS Investigators: Effect of dexmedetomidine *versus* lorazepam on outcome in patients with sepsis: An a priori-designed analysis of the MENDS randomized controlled trial. Crit Care 2010; 14:R38
- The MENDSII Study, Maximizing the Efficacy of Sedation and Reducing Neurological Dysfunction and Mortality in Septic Patients with Acute Respiratory Failure (MENDSII). 2016. Available at: <https://clinicaltrials.gov/ct2/show/NCT01739933>. Accessed May 2, 2016
- Su X, Meng ZT, Wu XH, Cui F, Li HL, Wang DX, Zhu X, Zhu SN, Maze M, Ma D: Dexmedetomidine decreases the incidence of delirium in elderly patients after non-cardiac surgery: A randomised, double-blind, placebo-controlled trial. Lancet 2016; (in press)
- Andersson U, Tracey KJ: Neural reflexes in inflammation and immunity. J Exp Med 2012; 209:1057–68
- Ma D, Hossain M, Rajakumaraswamy N, Arshad M, Sanders RD, Franks NP, Maze M: Dexmedetomidine produces its neuroprotective effect *via* the alpha 2A-adrenoceptor subtype. Eur J Pharmacol 2004; 502:87–97
- Xianbao L, Hong Z, Xu Z, Chunfang Z, Dunjin C: Dexmedetomidine reduced cytokine release during postpartum bleeding-induced multiple organ dysfunction syndrome in rats. Mediators Inflamm 2013; 2013:627831
- Sanders RD, Xu J, Shu Y, Januszewski A, Halder S, Fidalgo A, Sun P, Hossain M, Ma D, Maze M: Dexmedetomidine attenuates isoflurane-induced neurocognitive impairment in neonatal rats. ANESTHESIOLOGY 2009; 110:1077–85
- Laitio R, Hynninen M, Arola O, Virtanen S, Parkkola R, Saunavaara J, Roine RO, Grönlund J, Ylikoski E, Wennervirta

J, Bäcklund M, Silvasti P, Nukarinen E, Tiainen M, Saraste A, Pietilä M, Airaksinen J, Valanne L, Martola J, Silvennoinen H, Scheinin H, Harjola VP, Niiranen J, Korpi K, Varpula M, Inkinen O, Olkkola KT, Maze M, Vahlberg T, Laitio T: Effect of inhaled xenon on cerebral white matter damage in comatose survivors of out-of-hospital cardiac arrest: A randomized clinical trial. *JAMA* 2016; 315:1120–8

28. Azzopardi D, Robertson NJ, Bainbridge A, Cady E, Charles-Edwards G, Deierl A, Fagiolo G, Franks NP, Griffiths J, Hajnal J, Juszcak E, Kapetanakis B, Linsell L, Maze M, Omar O, Strohm B, Tusor N, Edwards AD: Moderate hypothermia within 6h of birth plus inhaled xenon *versus* moderate hypothermia alone after birth asphyxia (TOBY-Xe): A proof-of-concept, open-label, randomised controlled trial. *Lancet Neurol* 2016; 15:145–53

## ANESTHESIOLOGY REFLECTIONS FROM THE WOOD LIBRARY-MUSEUM

### From Chloroform to Melpomene, Liebig's Muse of Tragedy

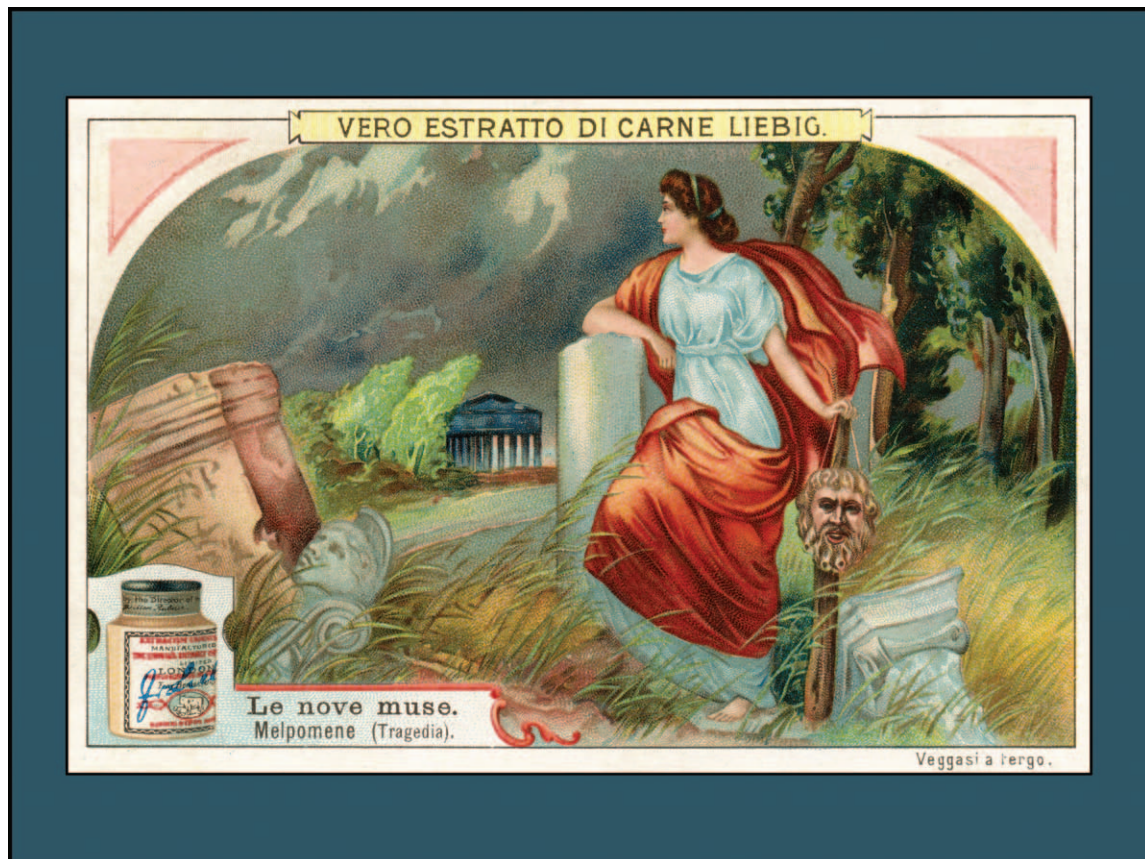

Rather than with her sister Thalia's mask of comedy, the Muse Melpomene ("songstress") is associated with the mask of tragedy, affixed here (*low right*) to her iconic Club of Heracles (Hercules). In her role as the Muse of Tragedy, perhaps Melpomene has wrought havoc with her Herculeanean Club, as depicted here on an Italian card advertising a company named after chloroform pioneer Justus von Liebig (1803 to 1873). Before the famous Library of Alexandria met its tragic end, the word *mouseion* ("shrine or seat of the Muses") was redefined as a place of study and eventually resurfaced in the English language as the word "museum." (Copyright © the American Society of Anesthesiologists' Wood Library-Museum of Anesthesiology.)

George S. Bause, M.D., M.P.H., Honorary Curator, ASA's Wood Library-Museum of Anesthesiology, Schaumburg, Illinois, and Clinical Associate Professor, Case Western Reserve University, Cleveland, Ohio. UJYC@aol.com.
